# Supplementary material for: Effects of Exercise on Sleep Quality and Insomnia in Adults: A Systematic Review and Meta-Analysis of Randomized Controlled Trials
Source: Front Psychiatry. 2021 Jun 7;12:664499. doi: 10.3389/fpsyt.2021.664499 (PMC8215288; doi:10.3389/fpsyt.2021.664499)
Supplement: Supplementary file 3 [file Table_1.XLSX]

## Sheet: PSQI
				Exercise				Control
				pre-test	post-test	total(N)		pre-test	post-test	total(N)
1	Karimi 2016	surveying the effects of an exercise program on the sleep quality of elderly males	Mean	7.59	4.09	23		5.66	5.5	23
			SD	0.68	3.57			3.08	0.51
2	Irwin 2008	Improving Sleep Quality in Older Adults with Moderate Sleep Complaints: A Randomized Controlled Trial of Tai Chi Chih	Mean	4.85	4.27	59		4.87	4.12	53
			SD	2.24	2.86			3.61	3.31
3	Irwin 2014	Cognitive Behavioral Therapy vs. Tai Chi for Late Life Insomnia and In ammatory Risk: A Randomized Controlled Comparative Ef cacy Trial	Mean	10.7	8	48		11.1	9.6	25
			SD	3.1	3.4			2.9	3
4	King 2008	Effects of Moderate-Intensity Exercise on Polysomnographic and Subjective Sleep Quality in Older Adults With Mild to Moderate Sleep Complaints	Mean	8.47	6.36	36		7.57	6.57	30
			SD	3.61	3.39			2.78	2.84
5	King 2019	Moderate-Intensity Exercise and Self-rated Quality of Sleep in Older Adults A Randomized Controlled Trial	Mean	change:-3.24		20		change:0.17		23
			SD	2.77				2.59
5	Brandão 2018	Home exercise improves the quality of sleep and daytime sleepiness of elderlies: a randomized controlled trial	Mean	change:-4.9		64		change:-0.7		61
			SD	5.7				5.8
6	Ashrafinia 2014	The effects of Pilates exercise on sleep quality in postpartum women	Mean	9.97	5.45	40		10.4	8.35	40
			SD	2.21	1.51			2.68	1.83
7	M.-C. Chen 2012	The effect of a simple traditional exercise programme (Baduanjin exercise) on sleep quality of older adults: A randomized controlled trial	Mean	11.93	6.22	27		11.11	10.5	28
			SD	3.5	1.74			3.37	3.5
8	K.-M. Chen 2015	Sleep quality and depression of nursing home older adults in wheelchairs after exercises	Mean	8.14	7.68	59		6.47	7.64	55
			SD	3.84	4.24			4.71	4.91
9	Aibar-Almazán 2019	Effects of Pilates training on sleep quality, anxiety, depression and fatigue in postmenopausal women: A randomized controlled trial	Mean	8.56	7.16	55		7.1	8.38	52
			SD	4.98	4.9			4.42	4.28
10	Yeh 2012	The Effect of Qigong on Menopausal Symptoms and Quality of Sleep for Perimenopausal Women: A Preliminary Observational Study	Mean	9.97	6.71	35		9.6	9.54	35
			SD	1.32	1.3			1.44	1.56
				Exercise:AA
11	Elavsky 2007	Lack of perceived sleep improvement after 4-month structured exercise programs	Mean	6.02	4.97	63		5.46	5.44	39
			SD	3.17	2.74			2.96	3.63
				Exercise:yoga
			Mean	6.9	6.48	61		5.46	5.44	39
			SD	3.94	4.22			2.96	3.63
12	K.-M. Chen 2010	Effects of Yoga on Sleep Quality and Depression in Elders in Assisted Living Facilities	Mean	5	3.48	31		4.88	7.21	24
			SD	3.67	2.95			4	4.32
13	Sternfeld 2014	Efficacy of exercise for menopausal symptoms: a randomized controlled trial	Mean	-2.4		79		-1.6		131
			SD	3.13				2.89

## Sheet: ISI
				Exercise				Control
				pre-test	post-test	total(N)		pre-test	post-test	total(N)
1	W.-F. Yeung 2018	Effects of Zero-time Exercise on inactive adults with insomnia disorder: a pilot randomized controlled trial	Mean	15.4	9	18		16	13.6	19
			SD	4.6669	4.6669			4.66402	4.88197
2	Afonso 2012	Yoga decreases insomnia in postmenopausal women: a randomized clinical trial	Mean	14.1	9.7	15		15.2	13.7	15
			SD	4.64758	4.64758			4.64758	4.64758
3	Hartescu 2015	Increased physical activity improves sleep and mood outcomes in inactive people with insomnia: a randomized controlled trial	Mean	change:-4.06		17		change-1.42		19
			SD	4.99				3.42
4	Sternfeld 2014	Efficacy of exercise for menopausal symptoms: a randomized controlled trial	Mean	change:-4		80		change:-3.1		130
			SD	4.94				4.32

## Sheet: ESS
				Exercise				Control
				pre-test	post-test	total(N)		pre-test	post-test	total(N)
1	X. Tan 2016	Effects of aerobic exercise on home-based sleep among overweight and obese men with chronic insomnia symptoms: a randomized controlled trial	Mean	8.4	6.8	24		8.3	7.4	21
			SD	3.32	3.08			4.72	4.94
2	Brandão 2018	Home exercise improves the quality of sleep and daytime sleepiness of elderlies: a randomized controlled trial	Mean	-2.8		64		-0.14		61
			SD	2.2				2.3

## Sheet: Actigrph
				SOL, Sleep Onset Latency(min)										TST, Total Sleep Time(min)										WASO, Wake After Sleep Onset(min)										SE, Sleep Efficiency(min)
				Exercise				Control						Exercise				Control						Exercise				Control						Exercise				Control
				pre-test	post-test	total(N)		pre-test	post-test	total(N)				pre-test	post-test	total(N)		pre-test	post-test	total(N)				pre-test	post-test	total(N)		pre-test	post-test	total(N)				pre-test	post-test	total(N)		pre-test	post-test	total(N)
1	W.-F. Yeung 2018	Effects of Zero-time Exercise on inactive adults with insomnia disorder: a pilot randomized controlled trial	Mean	15.6	17.7	18		20	17.5	19			Mean	389.2	379.2	18		403.8	394.5	19			Mean	41.5	39.7	18		48.7	34.4	19			Mean	83.3	83.3	18		83.1	83.7	19
			SD	8.86712	8.86712			8.89215	9.98188				SD	57.6999	57.6999			57.7118	64.7296				SD	26.8135	26.8135			26.8072	29.5969				SD	7.29734	7.29734			7.32295	8.28191
2	X. Tan 2016	Effects of aerobic exercise on home-based sleep among overweight and obese men with chronic insomnia symptoms: a randomized controlled trial	Mean	23.9	13.7	24		18.1	20.7	1			Mean	376.8	390.1	24		393.3	412.8	1			Mean	48.3	39.1	24		44.8	38.7	1			Mean	81.7	87.1	24		85.9	86.6	1
			SD	33.3915	18.8271			22.8474	27.0214				SD	54.5868	59.7969			49.3196	49.2097				SD	21.669	19.4192			13.4009	16.3666				SD	9.94641	7.3414			6.92012	7.02996
3	Li-Jung Chen 2016	Effects of Aquatic Exercise on Sleep in Older Adults with Mild Sleep Impairment: a Randomized Controlled Trial	Mean	13.8	12.5	33		17.4	20.4	34			Mean	330.8	342.9	33		333.8	344.5	34			Mean	83	76.5	33		84.2	91.4	34			Mean	75.5	82.2	33		75	76.3	34
			SD	8.04239	4.02119			10.4957	11.0788				SD	62.0413	67.7858			52.4786	50.1462				SD	33.3185	37.3397			41.9829	40.2336				SD	8.04239	6.31902			7.58024	8.74643
4	Alessi 1995	Does Physical Activity Improve Sleep in Impaired Nursing Home Residents?											Mean	372	378	33		384	408	32													Mean	70.1	71.5	33		73.9	76.3	32
													SD	96	114			126	96														SD	14.5	16.1			17.2	14.9
				Exercise:yoga										Exercise:yoga										Exercise:yoga										Exercise:yoga
5	Buchanan 2017	Effects of Yoga and Aerobic Exercise on Actigraphic Sleep Parameters in Menopausal Women with Hot Flashes	Mean	change:-0.2		52		change:0.9		80			Mean	change:8.5		52		change:6.5		80			Mean	change:-2.9		52		change:2		80			Mean	change:1.2		52		change:-0.3		80
			SD	15.09				13.93					SD	42.03				49.65					SD	15.45				19.32					SD	6.11				5.84
				Exercise:AA										Exercise:AA										Exercise:AA										Exercise:AA
			Mean	change:-1.4		54		change:0.9		80			Mean	change:-8.8		54		change:6.5		80			Mean	change:0		54		change:2		80			Mean	change:0.1		54		change:-0.3		80
			SD	11.72				13.93					SD	38.1				49.65					SD	16.85				19.32					SD	3.3				5.84
6	Oudegeest-Sander 2013	Impact of Physical Fitness and Daily Energy Expenditure on Sleep Efficiency in Young and Older Humans	Mean	11	11	11		8	8	10			Mean	371	367	11		386	379	10													Mean	82	80	11		84	82	10
			SD	7	5			4	3				SD	52	55			46	34														SD	11	12			8	7
